# Supplementary material for: Effectiveness and tolerance of single tablet versus once daily multiple tablet regimens as first-line antiretroviral therapy - Results from a large french multicenter cohort study
Source: PubMed Central journal article supplement (PMC5289500; doi:10.1371/journal.pone.0170661), 2017-02-02
Supplement: pone.0170661.s001.pdf [file pone.0170661.s001.pdf]

S1 Table: Detailed antiretroviral treatment among patients receiving multiple tablets once-daily (non-STR) or single tablet regimen (STR)

|                       | Non-STR group<br>(n=2713) | STR group<br>(n=499) |
|-----------------------|---------------------------|----------------------|
| 2 NRTI + 1 NNRTI      |                           |                      |
| Efavirenz             | 872 (32.1%)               | 473 (94.8%)          |
| Rilpivirine           | 0 (0%)                    | 26 (5.2%)            |
| 2 NRTI + 1 bPI        |                           |                      |
| Atazanavir            | 963 (35.5%)               | 0 (0%)               |
| Darunavir             | 878 (32.4%)               | 0 (0%)               |
| NRTI backbone         |                           |                      |
| Truvada/emtricitabine | 2190 (80.7%)              | 499 (100%)           |
| Abacavir/lamivudine   | 523 (19.3%)               | 0 (0%)               |

*NRTI, nucleoside reverse transcriptase inhibitor; NNRTI, non-nucleoside reverse transcriptase inhibitor; bPI, boosted protease inhibitor; STR, single tablet regimen.*
